# Supplementary material for: On the Dependence of Prion and Amyloid Structure on the Folding Environment
Source: MDPI journal article supplement (doi:10.3390/ijms222413494), 2021-12-16
Supplement: s1 [file s1]

# On the Dependence of Prion and Amyloid Structure on the Folding Environment

Irena Roterman \*, Katarzyna Stapor, Krzysztof Gądek, Tomasz Gubała, Piotr Nowakowski, Piotr Fabian and Leszek Konieczny

**Table S1.** List of proteins analysed in the paper. The numbers in parentheses in column PDB ID–number of protofibrils in superfibrils.

| PDB-ID                                             |                       | One Chain Prion Proteins                 |      |
|----------------------------------------------------|-----------------------|------------------------------------------|------|
| 1HJN                                               | Homo sapiens          | Major prion protein precursor            | [25] |
| 1HJM                                               | Homo sapiens          | prion protein at pH 7.0                  | [25] |
| 1E1W                                               | Homo sapiens          | prion protein variantRr220K              | [26] |
| 1DX0                                               | Bos taurus            | prion protein residues 23-230            | [27] |
| 6DU9                                               | Homo sapiens          | Major prion protein                      | [28] |
| 1QM3                                               | Homo sapiens          | prion protein fragment 121-230           | [29] |
| 1QLZ                                               | Homo sapiens          | Major prion protein                      | [29] |
| 1FKC                                               | Homo sapiens          | Major prion mutant E200K                 | [30] |
| 1DX1                                               | Bos taurus            | prion protein residues 23-230            | [31] |
| 1DWZ                                               | Bos taurus            | Major prion protein                      | [31] |
| 1AG2                                               | Mus musculus          | Major prion protein                      | [32] |
| Partially Unfolded Prion Proteins                  |                       |                                          |      |
| 5YJ5                                               | Homo sapiens          | wildtype human prion protein (m129)      | [33] |
| 5YJ4                                               | Homo sapiens          | mutant g127v of human prion protein      | [33] |
| 6FNV                                               | Odocoileus hemionus   | Major prion protein                      | [34] |
| 5L6R                                               | Homo sapiens          | truncated human prion protein            | [35] |
| Prion Proteins in Form of Dimers                   |                       |                                          |      |
| 4HLS                                               | Oryctolagus cuniculus | Mutant Major prion protein               | [36] |
| 4HMM                                               | Oryctolagus cuniculus | Major prion protein                      | [36] |
| 4HMR                                               | Oryctolagus cuniculus | Major prion protein                      | [36] |
| Prion-Like Proteins                                |                       |                                          |      |
| 1LG4                                               | Homo sapiens          | human doppel protein fragment 24-152     | [37] |
| 1I17                                               | Mus musculus          | mouse doppel 51-157                      | [38] |
| Prion Proteins in Complex with Fab Fragment of IgG |                       |                                          |      |
| 6AQ7                                               | Mus musculus          | Major prion protein                      | [39] |
| 4YXL                                               | Mesocricetus auratus  | Major prion protein from                 | [40] |
| 4MA7                                               | Mus musculus          | unp residues 116-229                     | [41] |
| 4MA8                                               | Mus musculus          | Major prion protein                      | [41] |
| Prion Proteins in Form of Amyloids                 |                       |                                          |      |
| 2KJ3                                               | Podospira anserin     | het-s(218-289)                           | [42] |
| 2RNM                                               | Podospira anserina    | het-s(218-289)                           | [43] |
| 2MUS                                               | Podospira anserinA    | (PrP(C))                                 | [44] |
| 2LBU                                               | Podospira anserinA    | Small s protein                          | [45] |
| 7LNA                                               | Mesocricetus auratus  | prp27-30, prp33-35c                      | [46] |
| 5W3N                                               | Homo sapiens          | RNA-binding protein fus                  | [47] |
| 6EKA                                               | Podospira anserina    | DNA chromosome 3                         | [48] |
| 6UUR                                               | Homo sapiens          | Human prion protein fibril, m129 variant | [49] |
| 6ZCF (2)                                           | Mus musculus          | Serum amyloid a-2 protein                | [50] |
| 6ZCG (4)                                           | Mus musculus          | murine saa1                              | [50] |
| 6LNI (2)                                           | Homo sapiens          | full-length human prion protein          | [51] |

|                                                                   |                         |                                            |      |
|-------------------------------------------------------------------|-------------------------|--------------------------------------------|------|
| 6VPS (3)                                                          | Drosophila melanogaster | Translational regulator orb2               | [52] |
| 7BX7 (2)                                                          | Homo sapiens            | Heterogeneous nuclear ribonucleoprotein a1 | [53] |
| <b>Reference Protein hnrnpa for Comparable Analysis with 7BX7</b> |                         |                                            |      |
| 1PGZ                                                              | synthetic               | telomeric repeat d(ttaggg)n                | [54] |
